# Supplementary material for: Area-Level Variation and Human Papillomavirus Vaccination among Adolescents and Young Adults in the United States: A Systematic Review
Source: Oxford University Press journal article supplement (doi:10.1158/1055-9965.epi-20-0617), 2020-10-02
Supplement: 10559965epi200617-sup-242029_3_supp_6579319_qh6brt.docx [file 10559965epi200617-sup-242029_3_supp_6579319_qh6brt.docx]

**Supplementary Table 1**: PubMed Medline Search Strategy

| 1 | ("Papillomavirus Vaccines"[Mesh] OR vaccin* OR immuni* OR gardasil OR cervarix) AND ("Papillomavirus Infections"[Mesh] OR HPV OR Human papilloma virus OR Human papillomavirus) |
| --- | --- |
| 2 | "Social Environment"[Mesh] OR "Residence Characteristics"[Mesh] OR neighborhood OR census tract OR zoning OR sociodemographic OR socio-demographic OR geography[Mesh] OR geography OR geographic |
| 3 | 1 AND 2 |
| 4 | Infant OR newborn OR "new born" OR perinatal OR neonatal OR baby OR babies OR toddler OR minors OR boy OR boys OR boyhood OR girl OR kid OR kids OR child OR child OR children OR schoolchild OR schoolchild OR school child[tiab] OR adolescent OR adolescence OR juvenile OR youth OR teen OR "under age" OR pubescent OR "Pediatrics"[MH] OR pediatric OR paediatric OR school[tiab] OR premature OR preterm |
| 5 | 3 AND 4 |
