# Supplementary material for: Area-Level Variation and Human Papillomavirus Vaccination among Adolescents and Young Adults in the United States: A Systematic Review
Source: Oxford University Press journal article supplement (doi:10.1158/1055-9965.epi-20-0617), 2020-10-02
Supplement: 10559965epi200617-sup-242029_3_supp_6579320_qh6bjt.xlsx [file 10559965epi200617-sup-242029_3_supp_6579320_qh6bjt.xlsx]

## Sheet: SupplementaryTable2
Supplementary Table 2. Quality Assessment Tool for Included Studies
		SELECTION BIAS (A)			STUDY DESIGN (B)					CONFOUNDERS			DATA COLLECTION METHODS			ANALYSES			FINAL DECISION
Author (Year)	Reviewer	Representativeness of target population	Percentage of selected individuals agreed to participate	Overall Section	Study design type	Randomized (Y/N)	Randomized as described (Y/N)	Method appropriate (Y/N)	Overall Section	Confounders adjusted for in analyses	Percentage of relevant confounders that were controlled for	Overall Section	Data tools valid?	Data collection tools reliable?	Overall Section	Indicate unit of allocation	Indicate unit of analysis	Statistical methods appropriate for study design?
Bednarczyk et al. (2019)	BR	1	1	1	Secondary Data Analysis	N	NA	Y	1	1,4,5	2	2	1	1	1	individual	community	Y	Moderate
	CAM	1	1	1	Secondary Data Analysis	N	N/A	Y	1	1,4,5	2	2	1	1	1	individual	community	Y	Moderate
	EKD	1	1	1	Secondary Data Analysis	N	N/A	Y	1	1,4,5	2	2	1	1	1	individual	community	Y	Moderate
Bodson et al. (2017)	BR	1	1	1	Secondary Data Analysis	N	NA	Y	1	1,3,4,5,6	1	1	1	1	1	individual	community	Y	Strong
	CAM	1	1	1	Secondary Data Analysis	N	N/A	Y	1	1,3,4,5,6	1	1	1	1	1	individual	community	Y	Strong
	EKD	1	1	1	Secondary Data Analysis	N	N/A	Y	1	1,3,4,5,6	1	1	1	1	1	individual	community	Y	Strong
Bernstein et al. (2016)	BR	1	1	1	Secondary Data Analysis	N	NA	Y	1	1,4,5	2	2	1	1	1	individual	community	Y	Moderate
	CAM	1	1	1	Secondary Data Analysis	N	N/A	Y	1	1,4,5	2	2	1	1	1	individual	community	Y	Moderate
	EKD	1	1	1	Secondary Data Analysis	N	N/A	Y	1	1,4,5	2	2	1	1	1	individual	community	Y	Moderate
Eberth et al. (2013)	BR	1	1	1	Secondary Data Analysis	N	NA	Y	1	1,4,5,6	1	1	1	1	1	individual	community	Y	Strong
	CAM	1	1	1	Secondary Data Analysis	N	N/A	Y	1	1,4,5,6	1	1	1	1	1	individual	community	Y	Strong
	EKD	1	1	1	Secondary Data Analysis	N	N/A	Y	1	1,4,5,6	1	1	1	1	1	individual	community	Y	Strong
Finney Rutten et al. (2017)	BR	1	1	1	Secondary Data Analysis	N	NA	Y	1	1,2,3	2	2	1	1	1	individual	community	Y	Moderate
	CAM	1	1	1	Secondary Data Analysis	N	N/A	Y	1	1,2,3	2	2	1	1	1	individual	community	Y	Moderate
	EKD	1	1	1	Secondary Data Analysis	N	N/A	Y	1	1,2,3	2	2	1	1	1	individual	community	Y	Moderate
Franco et al. (2019)	BR	1	1	1	Secondary Data Analysis	N	NA	Y	1	1,4,5	2	2	1	1	1	individual	community	Y	Moderate
	CAM	1	1	1	Secondary Data Analysis	N	N/A	Y	1	1,4,5	2	2	1	1	1	individual	community	Y	Moderate
	EKD	1	1	1	Secondary Data Analysis	N	N/A	Y	1	1,4,5	2	2	1	1	1	individual	community	Y	Moderate
Henry et al. (2016)	BR	1	1	1	Secondary Data Analysis	N	NA	Y	1	1,3,45,6	1	1	1	1	1	individual	community	Y	Strong
	CAM	1	1	1	Secondary Data Analysis	N	N/A	Y	1	1,3,45,6	1	1	1	1	1	individual	community	Y	Strong
	EKD	1	1	1	Secondary Data Analysis	N	N/A	Y	1	1,3,45,6	1	1	1	1	1	individual	community	Y	Strong
Henry et al. (2018)	BR	1	1	1	Secondary Data Analysis	N	NA	Y	1	1,3,4,5,6	1	1	1	1	1	individual	community	Y	Strong
	CAM	1	1	1	Secondary Data Analysis	N	N/A	Y	1	1,3,4,5,6	1	1	1	1	1	individual	community	Y	Strong
	EKD	1	1	1	Secondary Data Analysis	N	N/A	Y	1	1,3,4,5,6	1	1	1	1	1	individual	community	Y	Strong
Hirth et al. (2014)	BR	1	1	1	Secondary Data Analysis	N	NA	Y	1	1,2,3,4,5,6	1	1	1	1	1	individual	community	Y	Strong
	CAM	1	1	1	Secondary Data Analysis	N	N/A	Y	1	1,2,3,4,5,6	1	1	1	1	1	individual	community	Y	Strong
	EKD	1	1	1	Secondary Data Analysis	N	NA	Y	1	1,2,3,4,5,6	1	1	1	1	1	individual	community	Y	Stong
Kepka et al. (2016)	BR	1	1	1	Secondary Data Analysis	N	NA	Y	1	1,4,5	2	2	1	1	1	individual	community	Y	Moderate
	CAM	1	1	1	Secondary Data Analysis	N	N/A	Y	1	1,4,5	2	2	1	1	1	individual	community	Y	Moderate
	EKD	1	1	1	Secondary Data Analysis	N	N/A	Y	1	1,4,5	2	2	1	1	1	individual	community	Y	Moderate
Lu et al. (2019)	BR	1	1	1	Secondary Data Analysis	N	NA	Y	1	1,4,5	2	2	1	1	1	individual	community	Y	Moderate
	CAM	1	1	1	Secondary Data Analysis	N	N/A	Y	1	1,4,5	2	2	1	1	1	individual	community	Y	Moderate
	EKD	1	1	1	Secondary Data Analysis	N	N/A	Y	1	1,4,5	2	2	1	1	1	individual	community	Y	Moderate
McKillop et al. (2019)	BR	1	1	1	Secondary Data Analysis	N	NA	Y	1	1,4,7	2	2	1	1	1	individual	community	Y	Moderate
	CAM	1	1	1	Secondary Data Analysis	N	N/A	Y	1	1,4,7	2	2	1	1	1	individual	community	Y	Moderate
	EKD	1	1	1	Secondary Data Analysis	N	N/A	Y	1	1,4,7	2	2	1	1	1	individual	community	Y	Moderate
Nanagas et al. (2016)	BR	1	1	1	Secondary Data Analysis	N	NA	Y	1	1,3,4,7	1	1	1	1	1	individual	community	Y	Strong
	CAM	1	1	1	Secondary Data Analysis	N	N/A	Y	1	1,3,4,7	1	1	1	1	1	individual	community	Y	Strong
	EKD	1	1	1	Secondary Data Analysis	N	N/A	Y	1	1,3,4,7	1	1	1	1	1	individual	community	Y	Strong
Pruitt et al. (2010)	BR	1	1	1	Secondary Data Analysis	N	NA	Y	1	1,2,4,5,6	1	1	1	1	1	individual	community	Y	Strong
	CAM	1	1	1	Secondary Data Analysis	N	N/A	Y	1	1,2,4,5,6	1	1	1	1	1	individual	community	Y	Strong
	EKD	1	1	1	Secondary Data Analysis	N	N/A	Y	1	1,2,4,5,6	1	1	1	1	1	individual	community	Y	Strong
Rahman et al. (2014)	BR	1	1	1	Secondary Data Analysis	N	NA	Y	1	1,4,5	2	2	1	1	1	individual	community	Y	Moderate
	CAM	1	1	1	Secondary Data Analysis	N	N/A	Y	1	1,4,5	2	2	1	1	1	individual	community	Y	Moderate
	EKD	1	1	1	Secondary Data Analysis	N	N/A	Y	1	1,4,5	2	2	1	1	1	individual	community	Y	Moderate
Rahman et al. (2015)	BR	1	1	1	Secondary Data Analysis	N	NA	Y	1	1,3,5,6	1	1	1	1	1	individual	community	Y	Strong
	CAM	1	1	1	Secondary Data Analysis	N	N/A	Y	1	1,3,5,6	1	1	1	1	1	individual	community	Y	Strong
	EKD	1	1	1	Secondary Data Analysis	N	N/A	Y	1	1,3,5,6	1	1	1	1	1	individual	community	Y	Strong
Reiter et al. (2012)	BR	1	1	1	Secondary Data Analysis	N	NA	Y	1	1,4,5	2	2	1	1	1	individual	community	Y	Moderate
	CAM	1	1	1	Secondary Data Analysis	N	N/A	Y	1	1,4,5	2	2	1	1	1	individual	community	Y	Moderate
	EKD	1	1	1	Secondary Data Analysis	N	N/A	Y	1	1,4,5	2	2	1	1	1	individual	community	Y	Moderate
Sriram et al. (2019)	BR	1	1	1	Secondary Data Analysis	N	NA	Y	1	1,2,4,5,6	1	1	1	1	1	individual	community	Y	Strong
	CAM	1	1	1	Secondary Data Analysis	N	N/A	Y	1	1,2,4,5,6	1	1	1	1	1	individual	community	Y	Strong
	EKD	1	1	1	Secondary Data Analysis	N	N/A	Y	1	1,2,4,5,6	1	1	1	1	1	individual	community	Y	Strong
Swiecki-Sikora et al. (2019)	BR	1	1	1	Secondary Data Analysis	N	NA	Y	1	1,4,5,6,7	1	1	1	1	1	individual	community	Y	Strong
	CAM	1	1	1	Secondary Data Analysis	N	N/A	Y	1	1,4,5,6,7	1	1	1	1	1	individual	community	Y	Strong
	EKD	1	1	1	Secondary Data Analysis	N	N/A	Y	1	1,4,5,6,7	1	1	1	1	1	individual	community	Y	Strong
Trogdon & Ahn (2015)	BR	1	1	1	Secondary Data Analysis	N	NA	Y	1	1,2,4,5	1	1	1	1	1	individual	community	Y	Strong
	CAM	1	1	1	Secondary Data Analysis	N	N/A	Y	1	1,2,4,5	1	1	1	1	1	individual	community	Y	Strong
	EKD	1	1	1	Secondary Data Analysis	N	NA	Y	1	1,2,4,5	1	1	1	1	1	individual	community	Y	Strong
Vielot et al. (2017)	BR	1	1	1	Secondary Data Analysis	N	NA	Y	1	None	N/A	3	1	1	1	individual	community	Y	Moderate
	CAM	1	1	1	Secondary Data Analysis	N	N/A	Y	1	None	N/A	3	1	1	1	individual	community	Y	Moderate
	EKD	1	1	1	Secondary Data Analysis	N	N/A	Y	1	None	N/A	3	1	1	1	individual	community	Y	Moderate
Waldrop et al. (2017)	BR	1	1	1	Secondary Data Analysis	N	NA	Y	1	1,5	3	2	1	1	1	individual	community	Y	Moderate
	CAM	1	1	1	Secondary Data Analysis	N	N/A	Y	1	1,5	3	2	1	1	1	individual	community	Y	Moderate
	EKD	1	1	1	Secondary Data Analysis	N	N/A	Y	1	1,5	3	2	1	1	1	individual	community	Y	Moderate
Walker et al. (2019)	BR	1	1	1	Secondary Data Analysis	N	NA	Y	1	1,3,4,5,6,7	1	1	1	1	1	individual	community	Y	Strong
	CAM	1	1	1	Secondary Data Analysis	N	N/A	Y	1	1,3,4,5,6,7	1	1	1	1	1	individual	community	Y	Strong
	EKD	1	1	1	Secondary Data Analysis	N	N/A	Y	1	1,3,4,5,6,7	1	1	1	1	1	individual	community	Y	Strong
Wei et al. (2013)	BR	1	1	1	Secondary Data Analysis	N	NA	Y	1	1,3,4,5,6,7	1	1	1	1	1	individual	community	Y	Strong
	CAM	1	1	1	Secondary Data Analysis	N	N/A	Y	1	1,3,4,5,6,7	1	1	1	1	1	individual	community	Y	Strong
	EKD	1	1	1	Secondary Data Analysis	N	N/A	Y	1	1,3,4,5,6,7	1	1	1	1	1	individual	community	Y	Strong
