# Supplementary material for: Area-Level Variation and Human Papillomavirus Vaccination among Adolescents and Young Adults in the United States: A Systematic Review
Source: Oxford University Press journal article supplement (doi:10.1158/1055-9965.epi-20-0617), 2020-10-02
Supplement: 10559965epi200617-sup-242029_3_supp_6579321_qh6brt.xlsx [file 10559965epi200617-sup-242029_3_supp_6579321_qh6brt.xlsx]

## Sheet: Supplementary Table 3
Supplementary Table 3. Included Study Characteristics
Authors (Publication Year)	Study Design	Sample Population and Data Collection Year(s)	Statistical Methodological Approach	Sample Size (N)	Age of Sample	Sex (M = Males, F = Females)	Geographic Scale (State, County, Census Block, Zip Code etc.)	HPV Vaccination Measure(s)	HPV Vaccination Uptake			Individual-Level Variables	Additional Area-Level Variables
									Initiation		Completion
									≥ 1 dose (N, %)	≥ 2 doses (N, %)	≥ 3 doses (N, %)
Bednarczyk RA, Ellingson MK, Omer SB (2019)	cross-sectional secondary analysis of survey data, verified by provider-verified immunization records	National Immunization Survey-Teen (2016)	comparison of HPV vaccination status by key sociodemographic factors using proportions and 95% CI	20475	13-17 years	M, F	50 states and the District of Columbia	Initiation (≥ 1 dose), completion (≥ 3 doses) at two time points—13 and 15 years of age	23.6% after turning age 13; 7.0% after turning age 15	NA	15.7% prior to age 13; 34.8% prior to age 15	Teen sex, age, race/ethnicity, household poverty status, and number of health care providers	N/A
Bernstein S, North A, Schwartz J, and Niccolai LM (2016)	cross-sectional secondary analysis of survey data, paired with secondary data sources	National Immunization Survey - Teen (2012); US Census Bureau (unspecified); Presidential Election Results (2012)	comparison of median coverage using Kruskal-Wallis test; multivariable linear regression modeling used to determine the independent association between state-level voting patterns and vaccination coverage; backward elimination to arrive at final model	not specified	11-12 years	M, F	State-level voting patterns, where blue states are Democratic and red states are Republican	Initiation (≥ 1 dose)	Girls: (blue states: 63% vs red states 56%); Boys: (red states 34% blue states 47%)	NA	NA	sex	state-level sociodemographic factors from US Census Bureau (median household income, GINI index of income inequality, % of the population below poverty level, % of population with bachelors degree or higher, % population that is African American or Hispanic), measures of access to healthcare (% of uninsured children aged 0 to 18 years, physicians per capita, and having a usual source of care amon…
Bodson J, Ding Q, Warner EL, Hawkins AJ, Henry KA, and Kepka D (2017)	cross-sectional secondary analysis of survey data, verified by provider-verified immunization records	National Immunization Survey - Teen (2011 - 2012)	Pearson chi square tests used to compare initiators and noninitiators; multivariable weighted Poisson regression models with robust standard errors used to estimate adjusted prevalence ratios	2825 (manually summed from Table 1 of article)	13-17 years	F	Three subregions of Intermountain West [i.e., East (Colorado, Montana, Wyoming), Central (Idaho, Utah), and West (Arizona, New Mexico, Nevada)]	Initiation (≥ 1 dose), completion (≥ 3 doses)	1462, 51.8%	NA	929, 32.9%	teen age, race/ethnicity, and receipt of flu vaccination, TDAP, and meningitis; parent age, marital status, education, poverty; source of health insurance; provider facility type; providers' order vaccination from states/local HD	N/A
Eberth JM, Zhang X, Hossain M, Tiro JA, Holt JB, and Vernon SW (2013)	cross-sectional secondary analysis of survey data, paired with secondary data sources	Behavioral Risk Factor Surveillance System (2008), paired with data from US Census, Texas Cancer Registry, Association of Religion Data Archives, and US Office of Management & Budget	bivariate association tests between all variables and two primary HPV vaccination outcomes (initiation and completion) with Wald Chi-Square Tests; logistic regression used to identify variables associated with outcomes; multivariable logistic regression model conducted, producing adjusted odds ratios and 95% CI	277	18-26 years	F	County and health service region	Initiation (≥ 1 dose)	1.9-23.8%; average 11.4%	NA	NA	age, race/ethnicity, and education level from BRFSS	county and health services region (HSR, where available), insurance status, percent of population in poverty from the US Census Bureau; cervical cancer incidence rate from the Texas Cancer Registry; evangelical religious adherence rate from the Association of Religion Data Archives; and, rurality index from the US Office of Management & Budget
Finney Rutten LJ, Wilson PM, Jacobson DJ, Agunwamba AA, Brietkopf CR, Jacobson RM, and Sauver JLS (2017)	cross-sectional secondary analysis of data obtained from a linkage system capturing all healthcare utilization from medical records in Olmsted County MN since 1966, paired with secondary data sources	Rochester Epidemiology Project (Minnesota, 2010 and 2015), paired with data from American Community Survey (2014)	geocoded individual patient data linked to American Community Survey census block group level data, modelled as approximated Gaussian field using Stochastic Partial Differential Equations approach and Integrated Nested Laplace Approximations	150003	9-14 years	M, F	Census block	three-level dose categorization (1st, 2nd, and 3rd dose)	4066, 27.1%	2544, 17.0%	1524, 10.1%	age, sex, race/ethnicity (e.g. White, Black, Asian, Hispanic, and Other)	estimates of median household income in the past 12 months, proportion of population aged 25 and older with les than or equal to high school degree, proportion of population unemployed 16 years and over in the labor force, proportion of population on Medicaid/medical assistance, proportion of population living below the poverty level in the past 12 months, racial composition (proportion of non-Wh…
Franco, M , Mazzucca1, S, Padek, M and Brownson, RC (2019)	cross-sectional secondary analysis of survey data, paired with secondary data sources	National Immunization Survey (NIS)-Teen (2016) and state-level data collected from publically available sources	multi-level models were fit to identify important correlates of HPV vaccine completion and to quantify relationships with odds ratios and 95% Cis	20495	13-17 years	M, F	50 states and the District of Columbia	completion (≥3 doses or ≥ 2 doses with the 1st before age 15 and the interval between the 1st and 2nd at least 5 months and 4 days apart)	NA	NA	9204, 43.4%	teen age, gender, race/ethnicity, maternal education, family poverty status, and whether a provider had recommended an HPV vaccine series	state-level public health department type (decentral, central, mixed, or shared), CDC funding per capita, HPV vaccine mandates, sex education policy, political ideology, and religiousity
Henry KA, Stroup AM, Warner EL, and Kepka D (2016)	cross-sectional secondary analysis of restricted-use survey data with provider-verified vaccination records	National Immunization Survey - Teen restricted-use data (2012-2013), pared with data from the American Community Survey (2008-2012)	bivariate logistic regression models to estimate crude ORs and 95% Cis of vaccination initiation; multivariable model included only individual and provider factors; another two multivariable models were run to examine independent association of ZIP code level poverty and racial-ethnic composition with vaccination outcomes	20565	13-17 years	F	ZIP Code Tabulation Area (ZCTA)	Initiation (≥ 1 dose)	10899, 53.0%	NA	NA	age, race/ethnicity, health insurance type (employer or union, Medicaid, or State Children's Health Insurance, military or Indian Health Service, and no insurance), poverty status (above poverty, moderate income, below poverty based on US census thresholds), mother's age, mother's marital status, mother's educational status, provider recommendation to get HPV vaccine, and facility type where vacc…	from the American Community Survey (2008-2012): % of ZCTA residents living below federal poverty level, median household income of ZCTA, population density, racial/ethnic residential composition of ZCTA, rural and urban residence based on Rural-Urban Commuting Area Codes (RUCA)
Henry KA, Swiecki-Skora A, Stroup AM, Warner EL, and Kepka D (2018)	cross-sectional secondary analysis of restricted-use survey data with provider-verified vaccination records	National Immunization Survey - Teen restricted-use data (2012-2013), pared with data from the American Community Survey (2008-2012)	Median age and number of comorbidities compared between participants who consented to vaccine and those who did not via Mann-Whitney U tests; categorical variables compared with Chi-Square tests or Fishers' Exact tests; Logistic Regression analyses, with adjusted odds ratios with 95% CI reported	19518	13-17 years	M	ZIP Code Tabulation Area (ZCTA)	initiation (≥ 1 dose) and completion (≥ 3 doses)	5446, 27.9%	NA	2026, 10.38%	age, race/ethnicity (Non-Hispanic White, Non-Hispanic Black, Non-Hispanic Other, and Hispanic), health insurance type (employer or union, Medicaid, or the State Children's Health Insurance Program, military or Indian Health Service, and no insurance), poverty status (above poverty, high income, moderate income, and below poverty based on US Census thresholds), receipt of provider recommendation f…	N/A
Hirth JM, Rahman M, Smith JS, and Berenson AB (2014)	cross-sectional secondary analysis of survey data, paired with secondary data sources	Behavioral Risk Factor Surveillance System (2008 - 2010)	Rao-Scott Ratio Chi-Square tests used to examine differences between categorical variables and to test for interaction effects; multivariable logistic regression methods used to estimate odds for initiating and completing HPV vaccination among initiators	7849	9-17 years	F	Region: Northeast/Midwest/West, South/Southwest, Connecticut, New York, Pennsylvania, Wisconsin, Wyoming, Delaware, Kentucky, Oklahoma, Texas, and West Virginia	initiation (≥ 1 dose) and completion (≥ 3 doses)	0.269	NA	0.552	sex (male or female), relationship to child (parent/guardian, grandparent, sibling, or unrelated to child), insurance coverage, having a primary care doctor, marital status (married/partnered, single-never married, separated/divorced/widowed), and education (< high school, graduated high school, attended some college or college graduate), and youth characteristics (e.g. age, race/ethnicity), and …	N/A
Kepka D, Spigarelli MG, Warner EL, Yoneoka Y, McConnell N, and Balch AH (2016)	population-based secondary data analysis of de-identified vaccination and demographic data from an immunization information system	Utah Statewide Immunization Information System (2008 - 2012)	generalized linear mixed effects model, using PROC GLIMMIX, with assumption of binomial responses and a logit link	25866	11-26 years	F	ZIP Code	Missed opportunity: defined as "a clinical encounter where the patient received at least one adolescent vaccination, but not a HPV vaccine"	43.87% missed opportunities	NA	NA	age (pre-teen, teen, or young adult), race/ethnicity (White, American Indian/Alaskan Native, Black/African American, Asian/Pacific Islander, Hispanic, Other, and Not Given), rurality of residence (defined according to the 4-level Rural Urban Area Commuting Code using ZIP codes; urban, large rural, small rural, and isolated rural status)
Lu PJ, Yankey D, Fredua B, O'Halloran AC, Williams C, Markowitz LE, and Elam-Evans, LD (2019)	cross-sectional and longitudinal trends analysis using secondary survey data	National Immunization Survey-Teen (2011-2016)	multivariable logistic regression and predictive marginal modeling to derive the adjusted prevalence difference; these were also stratified by provider reommendation status	9712	13-17 years	M	State, metropolitan statistical area, and census region	initiation (≥ 1 dose)	9712, 57.3%	NA	NA	Teen age group, race/ethnicity, mother’s educational level, mother’s marital status, mother’s age, birth country, poverty level, health insurance status, provider recommendation, heatlhcare access variables, and vaccination facility type	N/A
McKillop CN, Leonard T, Pruitt SL, and Tiro JA (2019)	secondary analysis of medical record data, collected from an observational, longitudinal intervention study of parent-daughter dyads residing in Dallas, TX	Parent-daughter dyads residing in Dallas, Texas who were enrolled within a longitudinal intervention study, which provided access to electronic medical records and HPV vaccines through the Vaccines for Children (VFC) program (from 2011-2012)	Spatial econometric model that followed empirical methodology employed by Murdoch and Sandler (1984); this included implementing Moran's I test for spatial autocorrelation, followed by the implementation of spatial autoregressive probit models, and conducting robustness tests for neighborhood definition and neighborhood sorting effects.	601	11-18 years	F	Independent School District (ISD) Zone	≥ 2 doses	NA	145, 24.6%	NA	age, race/ethnicity (African American, Hispanic/Non-Hispanic, White), health insurance type (private, public, none), average number of missed appointments, past HPV vaccine refusal, receipt of other adolescent vaccines (flu in the past year, tetanus, diphtheria, TDAP, MCV), intervention status, clinic attended	N/A
Nanagas V, Stolfi A, Nanagas MT, Eberhart GM, and Alter SJ (2016)	secondary analysis of prospective medical records data from males participating in a longitudinal cohort study	Males seen for annual physical examinations in an urban child health clinic serving low-income families in Dayton, Ohio, who were offered the HPV4 vaccination before/after ACIP recommendations for vaccination, and followed for over 13 months (ending in April 2011)	geocoded individual patient data was spatially linked to SES data from the American Community Survey at census block group level; Bayesian hierarchical logistic regression used to model incident vaccination rates, adjusted for by individual and area-level SES characteristics and geolocation; geolocation modelled as approximated Gaussian field using Stochastic Partial Differential Equations approa…	Part 1 (HPV uptake/completion prior to ACIP recommendations): 292; Part 2 (HPV uptake/completion following ACIP recommendations): 495	11-18 years	M	ZIP Code	initiation (≥ 1 dose) and completion (≥ 3 doses)	228, 78%	NA	111, 38%	age, race (black vs. white/other), type of insurance (public vs private/self-pay), number of siblings, number and type of comorbidities, parent education level, home residence type based on zip code (urban, suburban, rural), healthcare provider (pediatrician or pediatric resident physician), whether other vaccines were given at the visit (TdaP and MCV)	N/A
Pruitt SL and Schootman M (2010)	cross-sectional secondary analysis of survey data, paired with secondary data sources	Behavioral Risk Factor Surveillance System (2008), paired with data from US Census (2000)	three-level random intercept logistic regression models in which individuals were nested within counties, nested within states. All models fit using second order penalized quasi-likelihood estimation and iterative generalized least squares algorithms	1709	13-17 years	F	State and County of Residence	Initiation (≥ 1 dose)	588, 34.4%	NA	NA	age, race/ethnicity, relationship to participant, household total annual income, parent education level, parent marital status, presence of other children in the home, having a usual source of healthcare not including an emergency room, and having medical insurance; parental preventative health orientation measured using: smoking status, seat belt use, timing of last medical check-up, and for mat…	poverty at the state- and count-level and the percent living in urban areas at county-level obtained from the 2000 US Census
Rahman M, McGrath CJ, and Berenson AB (2014)	cross-sectional secondary analysis of survey data, paired with secondary data sources	National Immunization Survey - Teen (2011)	Pearson chi square tests used to compare demographic characteristics among different geographic regions of the US; log-binomial regression models used to examine the association between region of residence and HPV vaccination initiation and completion after adjusting for sociodemographic characteristics	11236	13-17 years	F	Region of residence (i.e., northeast, Midwest, south, and west)	initiation (≥ 1 dose) and completion (≥ 3 doses)	5955, 53.0%	NA	391013, 34.8%	age, race/ethnicity, relationship to participant, eligibility for the Vaccine for Children (VFC) program, influenza vaccination before age 13, healthcare coverage, HPV vaccine awareness	N/A
Rahman M, Islam M, and Berenson AB (2015)	cross-sectional secondary analysis of survey data, paired with secondary data sources	Behavioral Risk Factor Surveillance System (2012) from 8 states (Alabama, Arizona, Connecticut, Delaware, Maine, Massachusetts, Texas, and West Virginia); US Census Bureau, Texas Cancer Registry, Association of Religion Data Archives, and US Office of Management & Budget	Rao-Scott likelihood ratio Chi square test used for bivariate comparisons; weighted multivariable logistic regression analyses used to examine association between geographic regions and HPV vaccination initiation and completion, adjusted for by covariates	3727	18-26 years	M, F	Respondent's region of residence (i.e., northeast, west, and south)	initiation (≥ 1 dose) and completion (≥ 3 doses)	Men: 6.3% Women: 40.4%	NA	Men: 1.7% Women: 27.4%	age (18-21 years, 22-26 years), race/ethnicity (non-Hispanic White, non-Hispanic Black, Hispanic, and non-Hispanic others), marital status (single or currently/previously married), education (less than high school, earning some college hours, graduating with a bachelors' degree or higher), annual household income (less than $50K, $50K-$75K, >$75K, or unsure), possession of health insurance, inter…	N/A
Reiter PL, Katz ML, and Paskett ED (2012)	cross-sectional secondary analysis of survey data, verified by provider-verified immunization records	National Immunization Survey - Teen (2008 - 2010)	chi-square tests and weighted logistic regression to determine if demographic and health-related characteristics differed by place of residence; multivariate model for each HPV vaccination outcome	27419	13-17 years	F	Appalachian residence (yes or no), Appalachian subregion: Northern, North Central, Central, South Central, or Southern	initiation (≥ 1 dose) and completion (≥ 3 doses)	Appalachian (40.8%) Non-Appalachian (43.6%)	NA	Appalachian (27.7%) Non-Appalachian (25.3%)	age, race/ethnicity, visited healthcare provider in last year, healthcare coverage, mother's age, mother's education, mother's marital status, knowledge of HPV and HPV vaccine, poverty status, urbanicity (non-MSA, MSA non-central city, MSA central city) based on residence	N/A
Sriram S and Ranganathan R (2019)	cross-sectional secondary analysis of survey data, verified by provider-verified immunization records	National Immunization Survey - Teen restricted-use data (2016)	multivariable logistic regression model to assess characteristics (individual and community level) associated with initiation of HPV series	43071	13-17 years	M, F	Region (Census region based on state of residence; South, North-East, Mid-West, West)	Initiation (household-reported HPV vaccination shot, if taken or not)	Not reported; calculated to be 64.9% (e.g. 43,071-15,135 = 27,936; 27,936/43,071 = 64.9%)	NA	NA	age, sex, maternal education, race/ethnicity, family income, insurance coverage type	N/A
Swiecki-Sikora AL, Henry KA, and Kepka DA (2019)	cross-sectional secondary analysis of survey data, verified by provider-verified immunization records	National Immunization Survey - Teen restricted-use data (2012-2013)	bivariate association tests for variables and primary outcomes with Wald Chi-square tests; weighted multivariable logistic regression used to identify geographic variables associated with primary outcomes	37114	13-17 years	M, F	ZIP Code Tabulation Area (ZCTA)	initiation (≥ 1 dose) and completion (≥ 3 doses)	55.6% F, 27.9% M	NA	35.3% F, 10.4% M	age, race/ethnicity (non-Hispanic White, non-Hispanic Black, Hispanic, Other), health insurance type (employer or union, Medicaid or State Children's' Health Insurance Program; military or Indian Health Service, no insurance), income/poverty (high income, moderate income, below poverty), mother's age, mother's education level (less than 12 years, 12 years with high school diploma, greater than 12…	N/A
Trogdon JG and Ahn T (2015)	ecological analysis at the ZIP code tabulation area (ZCTA) level using immunization registry data from age-eligible children (from 2008-2013), paired with data from secondary data sources	North Carolina Immunization Registry (2008 - 2013), paired with data from the US Census (2010), the American Community Survey (2008-2012), ZIP Business Patterns (2010), and the Area Resource File (2012-2013)	analyses conducted separately for boys and girls and for cumulative doses, as well as the number of children fully vaccinated; tested for spatial autocorrelation in the unadjusted HPV vaccination rates using choropleth maps; estimation of nonspatial count data models for HPV vaccinations sat the ZCTA level; estimation of negative binomial model with spatially correlated random effects; vaccinatio…	751 girls; 750 boys	9-14 years	M, F	ZIP Code Tabulation Area (ZCTA)	Number of publicly funded doses of HPV vaccine	Girls: 50.0%, Boys: 45.9% publicly funded doses per ZCTA	NA	3.4% for girls; 2.3% for boys	N/A	sex (% of total population that is female), race/ethnicity (% of total population that was Hispanic, Non-Hispanic Black, or Other/Multi-race, with Non-Hispanic White group omitted), education (% of total population with less than high school diploma and % of total with at least some college), health professional shortage area (HPSA), persistent poverty (having 20% or more of residents below pover…
Vielot NA, Butler AM, Brookart MA, Becker-Dreps S, and Smith JS (2017)	cross-sectional analysis of insurance claims data, paired with secondary data sources	Marketscan insurance claims database (2009 - 2014), paired with data from the US Census Bureau (2000)	estimated time to vaccination as the difference in time 0 and the date of the first vaccination claim; estimated total follow-up time as the difference between time 0 and the date of disenrollment or the end of the study period for adolescents not receiving vaccination; generalized estimating equations with a Poisson distribution and robust variance estimator was used to estimate vaccination inci…	1691223	11+ years	M, F	Region (Northeast, North Central, South, and West) and urbanicity (urban or rural)	Initiation (≥ 1 dose)	0.184	NA	NA	sex, urbanicity (as defined by urban residence, e.g. metropolitan statistical area (MSA) with population of greater than 50000) or rural residence (MSA with population less than 50,000), receipt of primary care in the year before observation, insurance plan type, birth cohort	region (Northeast, North Central, South, West)
Waldrop AR, Moss JL, Liu B, and Zhu L (2017)	cross-sectional secondary analysis of survey data, verified by provider-verified immunization records	National Immunization Survey - Teen (2011 - 2015)	unweighted frequencies and weighted percentages presented across 5 survey years; using 5-year estimates, choropleths were generated to depict state coverage for each vaccine; calculation of ranks and 95% CI via simulation analysis that estimated state vaccination coverage	103729	13-17 years	M, F	State of residence	Initiation (≥ 1 dose)	57.4% girls; 31.0% for boys	NA	NA	sex (female or male), race/ethnicity (non-Hispanic White or racial/ethnic minority), poverty level (based on parent-reported annual household income and size; below federal poverty level, above federal poverty level and less than $75,000 annual household income, and above federal poverty level and more than $75,000 annual household income)	N/A
Walker TY, Elam-Evans LD, Williams CL, Fredula B, Yankley D, Markowitz LE, and Stokely S (2019)	cross-sectional secondary analysis of survey data, verified by provider-verified immunization records, paired with secondary data sources	National Immunization Survey - Teen restricted-use data (2013-2017), paired with data from the US Census Bureau	linear regression using survey procedures to account for complex survey design for weighted data; weighted linear regression used to estimate average annual percentage point changes in coverage with greater than or equal to one dose of HPV vaccine, stratified by metropolitan statistical region (MSA)	103074	13-17 years	M,F	Metropolitan Statistical Area (MSA Principal City, MSA Non-Principal City, and Non-MSA)	Initiation (≥ 1 dose)	44.9% (2013) 65.5% (2017); 5.1% annual increase	NA	NA	year of birth, sex, race/ethnicity, mother's age, mother's education, income to poverty ratio, poverty level, insurance status, had 11-12 well child visit, provider recommendation, provider facility type	N/A
Wei F, Moore PC, and Green AL (2013)	cross-sectional secondary analysis of survey data, paired with secondary data sources	National Health Interview Survey (NHIS; 2010) and the 2010 NHIS Cancer Control Module Supplement	bivariate analyses to determine the relationship between individual independent variables and HPV series initiation; multivariable logistic regression model to assess characteristics associated with initiation of HPV series	1867	18-26 years	F	Respondent's region of residence (i.e., northeast, north central/Midwest, south, and west)	Initiation (≥ 1 dose)	408, 21.9%	NA	NA	age, race, marital status, poverty level, employment status, women's health (ever had kids, taking birth control pills, abnormal pap results, time of last pap test, ever had HPV, had a non-HIV STD in the past 5 years), other health related issues (self assessed physical health, daily smoker), alcohol status, healthcare utilization, regular healthcare provider, last clinic visit a year or more, re…	N/A
Williams CL, Walker TY, Elam-Evans LD, Yankey D, Fredua B, Saraiya M, Stokley S (2020)	cross-sectional secondary analysis of survey data, verified by provider-verified immunization records	National Immunization Survey - Teen restricted-use data (2016-2017)	t-tests to compare weighted percentage of sociodemographic factors by metropolitan statistical area (MSA) status; bivariate analyses to identify sociodemographic factors associated with non-initiation of the HPV vaccine series within MSAs; multiple logistic regression to evaluate associations between MSA and HPV vaccination using weighted survey data to account for complex sampling design	41424	13-17 years	M, F	Metropolitan Statistical Area (household county of residence; mostly urban areas, suburban areas, and mostly rural areas )	Missed opportunity: defined as "a clinical encounter where the patient received at least one adolescent vaccination, but not a HPV vaccine"	37.0% missed opportunities	NA	NA	age, sex race/ethnicity, immigration status, maternal age, maternal education, maternal marital status, parental awareness of the Vaccines for Children (VFC) program, income-poverty ratio, insurance coverage type, 11-12 year old well-child visit presence or absence, provider recommendation, vaccination facility type	N/A
